# Supplementary material for: Prioritizing Asthma Treatment Drugs through Multicriteria Decision Making
Source: Hindawi journal article supplement (doi:10.1155/2024/6516976), 2024-02-05
Supplement: f1 [file 6516976.f1.zip]

# Prioritizing Asthma Treatment Drugs Through Multi-Criteria Decision Making

**Sobia Sultana**

Department of Mathematics and Statistics, Faculty of Science, Imam Mohammad Ibn Saud Islamic University(IMSUI), P.O. Box 90950, Riyadh 11623, Saudi Arabia;

\* Correspondance: Email [ssmahmood@imamu.edu.sa](mailto:ssmahmood@imamu.edu.sa)

**Table 1.1:** Initial input matrix with weights assignments and classifying chemical indices as beneficial and non-beneficial criteria (Flash Point Case).

|                    | NB     | B      | B      | B       | NB     | NB    | NB    | NB     | NB    | NB     |
|--------------------|--------|--------|--------|---------|--------|-------|-------|--------|-------|--------|
| <b>Weights</b>     | 0.0901 | 0.125  | 0.130  | 0.121   | 0.092  | 0.079 | 0.081 | 0.120  | 0.083 | 0.0811 |
|                    | ABC(G) | GA(G)  | SCI(G) | RR(G)   | R(G)   | F(G)  | HM(G) | H(G)   | M1(G) | M2(G)  |
| <b>Toreforant</b>  | 22.902 | 31.100 | 14.683 | 75.019  | 13.991 | 394   | 754   | 13.530 | 154   | 180    |
| <b>Bedoradrine</b> | 23.720 | 31.930 | 15.313 | 75.716  | 14.867 | 396   | 754   | 14.300 | 156   | 179    |
| <b>Abediterol</b>  | 25.171 | 33.949 | 16.338 | 79.534  | 15.882 | 418   | 792   | 15.352 | 164   | 187    |
| <b>Fevipiprant</b> | 22.836 | 35.175 | 13.861 | 74.619  | 13.392 | 452   | 826   | 12.471 | 158   | 187    |
| <b>Setipipran</b>  | 24.115 | 33.181 | 15.435 | 82.221  | 14.525 | 440   | 850   | 14.100 | 168   | 205    |
| <b>Ramatroban</b>  | 23.120 | 30.754 | 14.588 | 75.615  | 14.017 | 421   | 791   | 13.386 | 157   | 185    |
| <b>Zafirlukast</b> | 32.271 | 43.495 | 20.546 | 106.524 | 19.640 | 582   | 1102  | 18.886 | 220   | 260    |
| <b>Pranlukast</b>  | 28.300 | 39.368 | 18.591 | 92.555  | 17.670 | 464   | 902   | 17.366 | 188   | 219    |
| <b>Montelukast</b> | 32.442 | 43.355 | 20.522 | 105.964 | 19.600 | 588   | 1100  | 18.819 | 220   | 256    |
| <b>Vilanterol</b>  | 23.610 | 32.225 | 15.735 | 72.388  | 15.524 | 354   | 682   | 15.100 | 148   | 164    |
| <b>Indacaterol</b> | 22.713 | 31.120 | 14.654 | 76.115  | 13.995 | 406   | 780   | 13.533 | 156   | 187    |
| <b>Olodaterol</b>  | 21.738 | 28.723 | 13.721 | 70.010  | 13.270 | 390   | 726   | 12.633 | 146   | 168    |
| <b>Formoterol</b>  | 18.632 | 25.201 | 12.232 | 58.317  | 12.028 | 298   | 568   | 11.600 | 120   | 135    |
| <b>Salmeterol</b>  | 22.058 | 30.493 | 14.919 | 66.924  | 14.703 | 314   | 610   | 14.433 | 136   | 148    |
| <b>Terbutaline</b> | 12.078 | 14.799 | 7.289  | 36.171  | 7.277  | 218   | 386   | 6.666  | 78    | 84     |
| <b>Salbutamol</b>  | 12.635 | 15.896 | 7.827  | 38.404  | 7.832  | 226   | 406   | 7.266  | 82    | 90     |

|                       |        |        |        |         |        |     |      |        |     |     |
|-----------------------|--------|--------|--------|---------|--------|-----|------|--------|-----|-----|
| <b>Metaproterenol</b> | 11.113 | 14.168 | 6.986  | 33.256  | 6.986  | 180 | 332  | 6.533  | 70  | 76  |
| <b>Isoproterenol</b>  | 11.073 | 14.209 | 6.999  | 33.357  | 7.003  | 180 | 334  | 6.566  | 70  | 77  |
| <b>Epinephrine</b>    | 9.440  | 12.440 | 6.130  | 28.858  | 6.147  | 152 | 286  | 5.833  | 60  | 67  |
| <b>Ideal Best</b>     | 9.440  | 43.495 | 20.546 | 106.524 | 6.968  | 152 | 286  | 6.533  | 60  | 67  |
| <b>Ideal Worst</b>    | 32.442 | 14.168 | 6.130  | 33.256  | 19.640 | 588 | 1102 | 18.886 | 220 | 260 |

**Table 1.2:** Computation of  $D_j$  and  $B_j$  for Flash Point.

|             |       |       |       |       |       |       |       |       |       |       |
|-------------|-------|-------|-------|-------|-------|-------|-------|-------|-------|-------|
| Toreforant  | 0.053 | 0.050 | 0.053 | 0.049 | 0.053 | 0.044 | 0.047 | 0.071 | 0.049 | 0.048 |
| Bedoradrine | 0.056 | 0.046 | 0.047 | 0.048 | 0.059 | 0.044 | 0.047 | 0.078 | 0.050 | 0.047 |
| Abediterol  | 0.062 | 0.038 | 0.038 | 0.042 | 0.066 | 0.048 | 0.050 | 0.088 | 0.054 | 0.050 |
| Fevipirant  | 0.053 | 0.033 | 0.060 | 0.050 | 0.049 | 0.054 | 0.054 | 0.061 | 0.051 | 0.050 |
| Setipipran  | 0.058 | 0.041 | 0.046 | 0.038 | 0.057 | 0.052 | 0.056 | 0.076 | 0.056 | 0.058 |
| Ramatroban  | 0.054 | 0.051 | 0.054 | 0.048 | 0.053 | 0.049 | 0.050 | 0.069 | 0.050 | 0.050 |
| Zafirlukast | 0.089 | 0.000 | 0.000 | 0.000 | 0.092 | 0.078 | 0.081 | 0.120 | 0.083 | 0.081 |
| Pranlukast  | 0.074 | 0.017 | 0.018 | 0.022 | 0.078 | 0.057 | 0.061 | 0.106 | 0.066 | 0.064 |
| Montelukast | 0.090 | 0.001 | 0.000 | 0.001 | 0.091 | 0.079 | 0.081 | 0.119 | 0.083 | 0.079 |
| Vilanterol  | 0.056 | 0.045 | 0.043 | 0.053 | 0.064 | 0.037 | 0.039 | 0.085 | 0.045 | 0.041 |
| Indacaterol | 0.052 | 0.050 | 0.052 | 0.047 | 0.053 | 0.046 | 0.049 | 0.071 | 0.050 | 0.050 |
| Olodaterol  | 0.048 | 0.059 | 0.061 | 0.057 | 0.048 | 0.043 | 0.044 | 0.063 | 0.044 | 0.042 |
| Formoterol  | 0.036 | 0.073 | 0.075 | 0.075 | 0.040 | 0.027 | 0.028 | 0.053 | 0.031 | 0.029 |
| Salmeterol  | 0.049 | 0.052 | 0.051 | 0.062 | 0.058 | 0.029 | 0.032 | 0.079 | 0.039 | 0.034 |

|                |       |       |       |       |       |       |       |       |       |       |
|----------------|-------|-------|-------|-------|-------|-------|-------|-------|-------|-------|
| Terbutaline    | 0.010 | 0.115 | 0.119 | 0.109 | 0.008 | 0.012 | 0.010 | 0.008 | 0.009 | 0.007 |
| Salbutamol     | 0.013 | 0.111 | 0.114 | 0.106 | 0.011 | 0.013 | 0.012 | 0.013 | 0.011 | 0.010 |
| Metaproterenol | 0.007 | 0.118 | 0.122 | 0.114 | 0.006 | 0.005 | 0.005 | 0.006 | 0.005 | 0.004 |
| Isoproterenol  | 0.006 | 0.117 | 0.122 | 0.114 | 0.006 | 0.005 | 0.005 | 0.007 | 0.005 | 0.004 |
| Epinephrine    | 0.000 | 0.125 | 0.130 | 0.121 | 0.000 | 0.000 | 0.000 | 0.000 | 0.000 | 0.000 |

**Table 2.1:** Initial input matrix with weights assignments and classifying chemical indices as beneficial and non-beneficial criteria (Boiling Point Case).

|                    | B            | B            | B            | B            | B            | NB           | NB           | NB           | B            | NB           |
|--------------------|--------------|--------------|--------------|--------------|--------------|--------------|--------------|--------------|--------------|--------------|
| <b>Weights</b>     | <b>0.120</b> | <b>0.092</b> | <b>0.125</b> | <b>0.130</b> | <b>0.090</b> | <b>0.079</b> | <b>0.081</b> | <b>0.081</b> | <b>0.121</b> | <b>0.083</b> |
|                    | ABC(G)       | GA(G)        | SCI(G)       | RR(G)        | R(G)         | F(G)         | HM(G)        | H(G)         | M1(G)        | M2(G)        |
| <b>Toreforant</b>  | 22.902       | 31.100       | 14.683       | 75.019       | 13.991       | 394          | 754          | 13.53        | 154          | 180          |
| <b>Bedoradrine</b> | 23.720       | 31.930       | 15.313       | 75.716       | 14.867       | 396          | 754          | 14.3         | 156          | 179          |
| <b>Abediterol</b>  | 25.171       | 33.949       | 16.338       | 79.534       | 15.882       | 418          | 792          | 15.352       | 164          | 187          |
| <b>Fevipirant</b>  | 22.836       | 35.175       | 13.861       | 74.619       | 13.392       | 452          | 826          | 12.471       | 158          | 187          |
| <b>Setipipran</b>  | 24.115       | 33.181       | 15.435       | 82.221       | 14.525       | 440          | 850          | 14.1         | 168          | 205          |
| <b>Ramatroban</b>  | 23.120       | 30.754       | 14.588       | 75.615       | 14.017       | 421          | 791          | 13.386       | 157          | 185          |
| <b>Zafirlukast</b> | 32.271       | 43.495       | 20.546       | 106.524      | 19.640       | 582          | 1102         | 18.886       | 220          | 260          |
| <b>Pranlukast</b>  | 28.300       | 39.368       | 18.591       | 92.555       | 17.670       | 464          | 902          | 17.366       | 188          | 219          |
| <b>Montelukast</b> | 32.442       | 43.355       | 20.522       | 105.964      | 19.600       | 588          | 1100         | 18.819       | 220          | 256          |
| <b>Vilanterol</b>  | 23.610       | 32.225       | 15.735       | 72.388       | 15.524       | 354          | 682          | 15.100       | 148          | 164          |
| <b>Indacaterol</b> | 22.713       | 31.120       | 14.654       | 76.115       | 13.995       | 406          | 780          | 13.533       | 156          | 187          |
| <b>Olodaterol</b>  | 21.738       | 28.723       | 13.721       | 70.010       | 13.270       | 390          | 726          | 12.633       | 146          | 168          |

|                       |        |        |        |         |        |     |      |        |     |     |
|-----------------------|--------|--------|--------|---------|--------|-----|------|--------|-----|-----|
| <b>Formoterol</b>     | 18.632 | 25.201 | 12.232 | 58.317  | 12.028 | 298 | 568  | 11.600 | 120 | 135 |
| <b>Salmeterol</b>     | 22.058 | 30.493 | 14.919 | 66.924  | 14.703 | 314 | 610  | 14.433 | 136 | 148 |
| <b>Terbutaline</b>    | 12.078 | 14.799 | 7.289  | 36.171  | 7.277  | 218 | 386  | 6.666  | 78  | 84  |
| <b>Salbutamol</b>     | 12.635 | 15.896 | 7.827  | 38.404  | 7.832  | 226 | 406  | 7.266  | 82  | 90  |
| <b>Metaproterenol</b> | 11.113 | 14.168 | 6.986  | 33.256  | 6.986  | 180 | 332  | 6.533  | 70  | 76  |
| <b>Isoproterenol</b>  | 11.073 | 14.209 | 6.999  | 33.357  | 7.003  | 180 | 334  | 6.566  | 70  | 77  |
| <b>Epinephrine</b>    | 9.440  | 12.440 | 6.130  | 28.858  | 6.147  | 152 | 286  | 5.833  | 60  | 67  |
| <b>Ideal Best</b>     | 32.442 | 43.495 | 20.546 | 106.524 | 19.640 | 152 | 286  | 6.533  | 220 | 67  |
| <b>Ideal Worst</b>    | 9.440  | 14.168 | 6.130  | 33.256  | 6.968  | 588 | 1102 | 18.886 | 60  | 260 |

**Table 2.2:** Computation of  $D_j$  and  $B_j$  for Boiling point.

|             |       |       |       |       |       |       |        |       |       |       |
|-------------|-------|-------|-------|-------|-------|-------|--------|-------|-------|-------|
| Toreforant  | 0.050 | 0.039 | 0.051 | 0.056 | 0.040 | 0.044 | 0.047  | 0.046 | 0.050 | 0.048 |
| Bedoradrine | 0.046 | 0.036 | 0.045 | 0.055 | 0.034 | 0.044 | 0.046  | 0.051 | 0.048 | 0.048 |
| Abediterol  | 0.038 | 0.030 | 0.036 | 0.048 | 0.027 | 0.048 | 0.050  | 0.058 | 0.042 | 0.051 |
| Fevipirant  | 0.050 | 0.026 | 0.058 | 0.056 | 0.045 | 0.054 | 0.054  | 0.039 | 0.047 | 0.051 |
| Setipipran  | 0.043 | 0.032 | 0.044 | 0.043 | 0.036 | 0.052 | 0.056  | 0.050 | 0.039 | 0.059 |
| Ramatroban  | 0.049 | 0.040 | 0.052 | 0.055 | 0.040 | 0.049 | 0.0502 | 0.045 | 0.048 | 0.051 |
| Zafirlukast | 0.001 | 0.000 | 0.000 | 0.000 | 0.000 | 0.078 | 0.081  | 0.081 | 0.000 | 0.083 |
| Pranlukast  | 0.022 | 0.013 | 0.017 | 0.025 | 0.014 | 0.057 | 0.061  | 0.071 | 0.024 | 0.065 |
| Montelukast | 0.000 | 0.001 | 0.000 | 0.001 | 0.000 | 0.079 | 0.081  | 0.081 | 0.000 | 0.081 |
| Vilanterol  | 0.046 | 0.035 | 0.042 | 0.060 | 0.029 | 0.036 | 0.039  | 0.056 | 0.054 | 0.042 |

|                |       |       |       |       |       |       |       |          |       |       |
|----------------|-------|-------|-------|-------|-------|-------|-------|----------|-------|-------|
| Indacaterol    | 0.051 | 0.039 | 0.051 | 0.054 | 0.040 | 0.046 | 0.049 | 0.046    | 0.048 | 0.051 |
| Olodaterol     | 0.056 | 0.046 | 0.059 | 0.065 | 0.045 | 0.043 | 0.044 | 0.040    | 0.056 | 0.043 |
| Formoterol     | 0.072 | 0.057 | 0.072 | 0.085 | 0.054 | 0.027 | 0.028 | 0.033    | 0.076 | 0.029 |
| Salmeterol     | 0.054 | 0.041 | 0.049 | 0.070 | 0.035 | 0.029 | 0.032 | 0.052    | 0.063 | 0.035 |
| Terbutaline    | 0.106 | 0.090 | 0.115 | 0.124 | 0.088 | 0.012 | 0.010 | 0.001    | 0.107 | 0.007 |
| Salbutamol     | 0.103 | 0.086 | 0.110 | 0.121 | 0.084 | 0.013 | 0.012 | 0.005    | 0.104 | 0.010 |
| Metaproterenol | 0.111 | 0.092 | 0.117 | 0.130 | 0.090 | 0.005 | 0.005 | 0.000    | 0.113 | 0.004 |
| Isoproterenol  | 0.112 | 0.091 | 0.117 | 0.129 | 0.090 | 0.005 | 0.005 | 0.000217 | 0.113 | 0.004 |
| Epinephrine    | 0.120 | 0.097 | 0.125 | 0.137 | 0.096 | 0.000 | 0.000 | -0.005   | 0.121 | 0.000 |

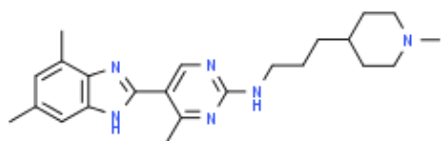

(a) Toreforant

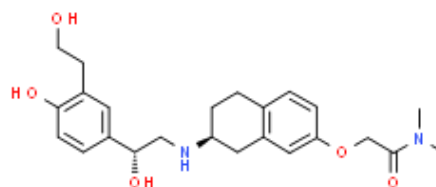

(b) Bedoradrine

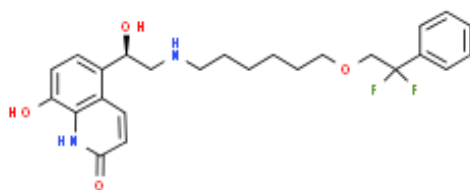

(c) Abediterol

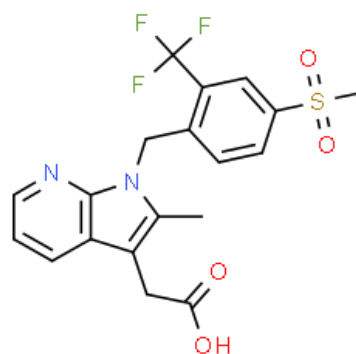

(d) Fevipiprant

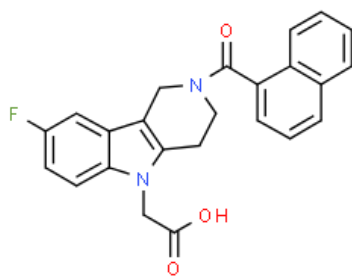

(e) Setipiprant

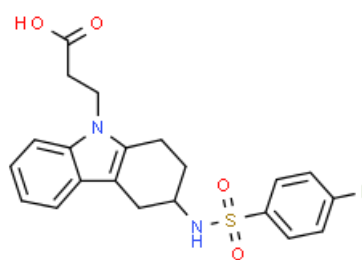

(f) Ramatroban

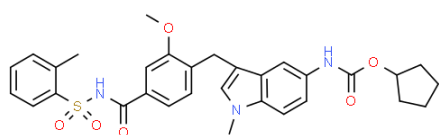

(g) Zafirlukast

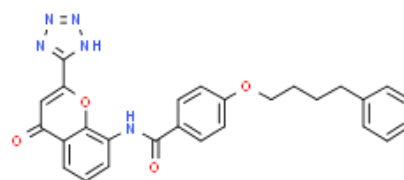

(h) Pranlukast

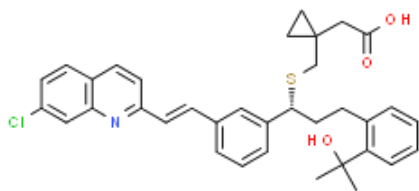

(i) Montelukast

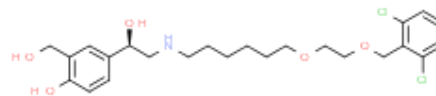

(j) Vilanterol

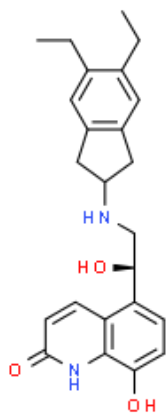

(k) Indacaterol

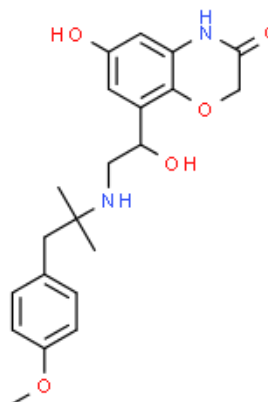

(l) Olodaterol

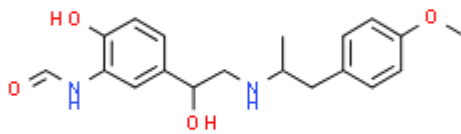

(m) Formoterol

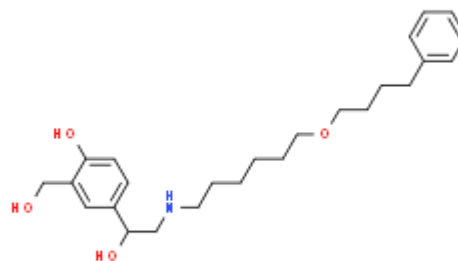

(n) Salmeterol

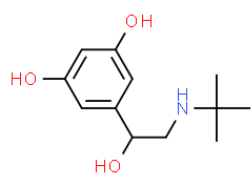

(o) Terbutaline

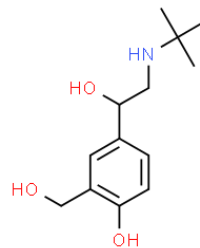

(p) Salbutamol

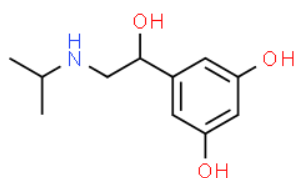

(q) Metaproterenol

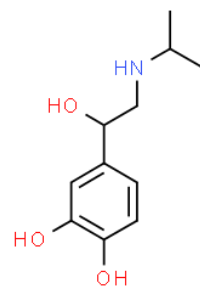

(r) Isoproterenol

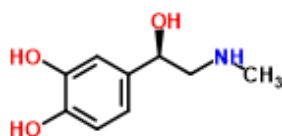

(s) Epinephrine

**Figure 1.1:** Structure of numerous key asthma drugs used in COVID-19.
